# Supplementary material for: An ERβ agonist induces browning of subcutaneous abdominal fat pad in obese female mice
Source: PubMed Central journal article supplement (PMC5138613; doi:10.1038/srep38579), 2016-12-06
Supplement: srep38579-s1.pdf [file srep38579-s1.pdf]

**An ER $\beta$  agonist induces browning of subcutaneous  
abdominal fat pad in obese female mice**

Yi-fei Miao<sup>1,†</sup>, Wen Su<sup>2,†</sup>, Yu-bing Dai<sup>1</sup>, Wan-fu Wu<sup>1</sup>, Bo Huang<sup>1</sup>, Rodrigo P. A. Barros<sup>1</sup>, Hao Nguyen<sup>1</sup>, Laure Maneix<sup>1</sup>, You-fei Guan<sup>1,3</sup>, Margaret Warner<sup>1</sup> and Jan-Åke Gustafsson<sup>1,4,\*</sup>

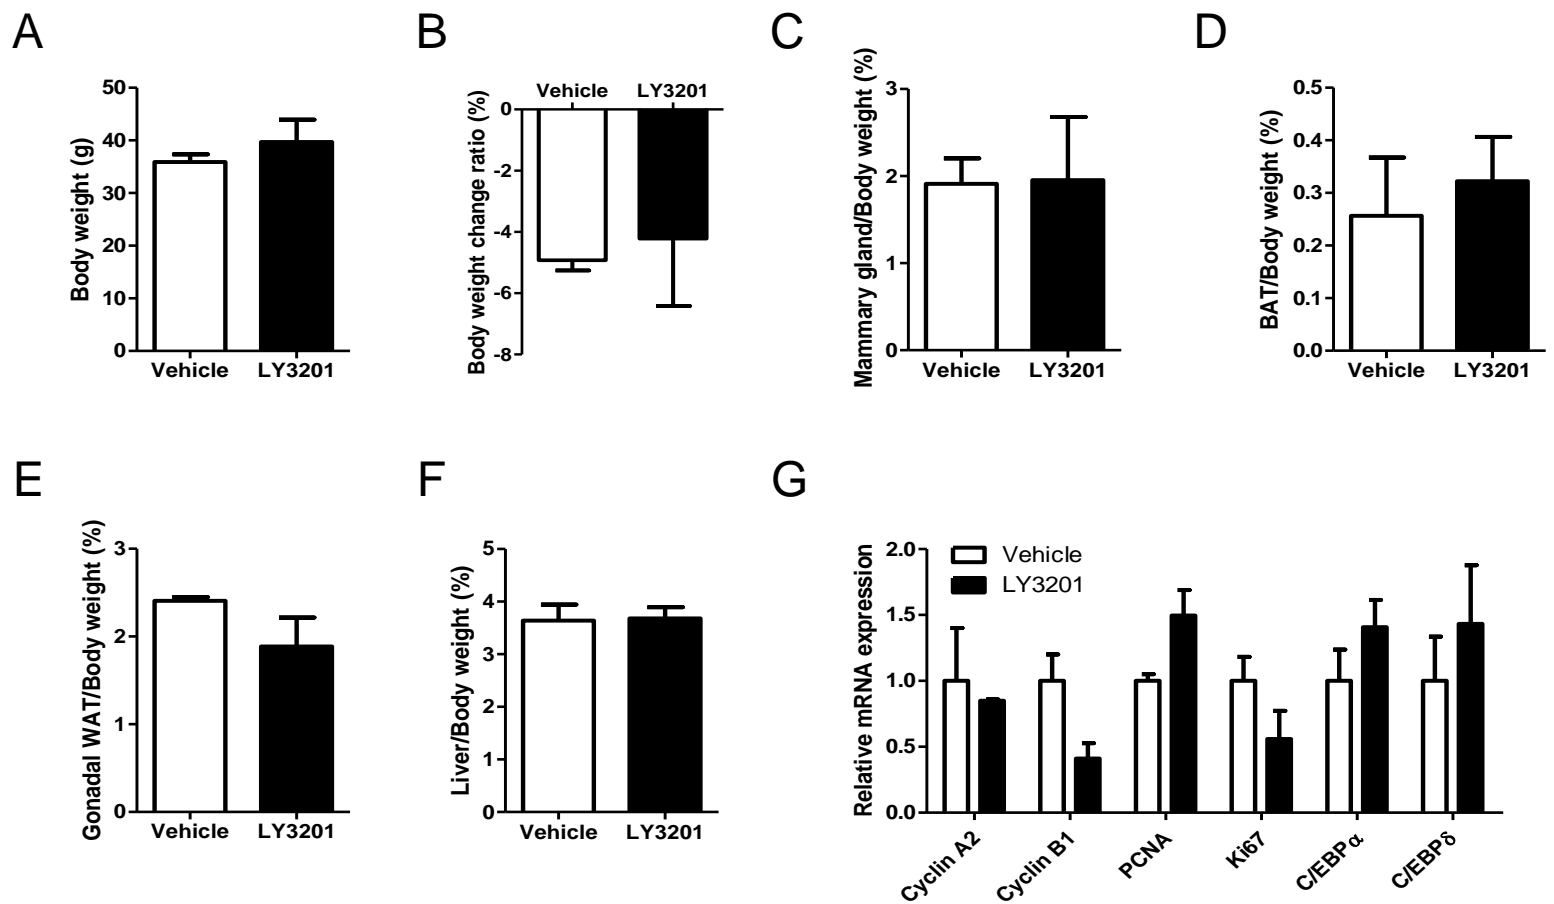

**Supplementary Figure S1.** No change of body weight or organ weights after the treatment with LY3201 in aged, obese female WT mice. A short term treatment with LY3201 did not change the body weight (A&B) or lipid-metabolically active organs weights (C-F). (G) ER $\beta$  ligand did not induce cell proliferative genes in MG.

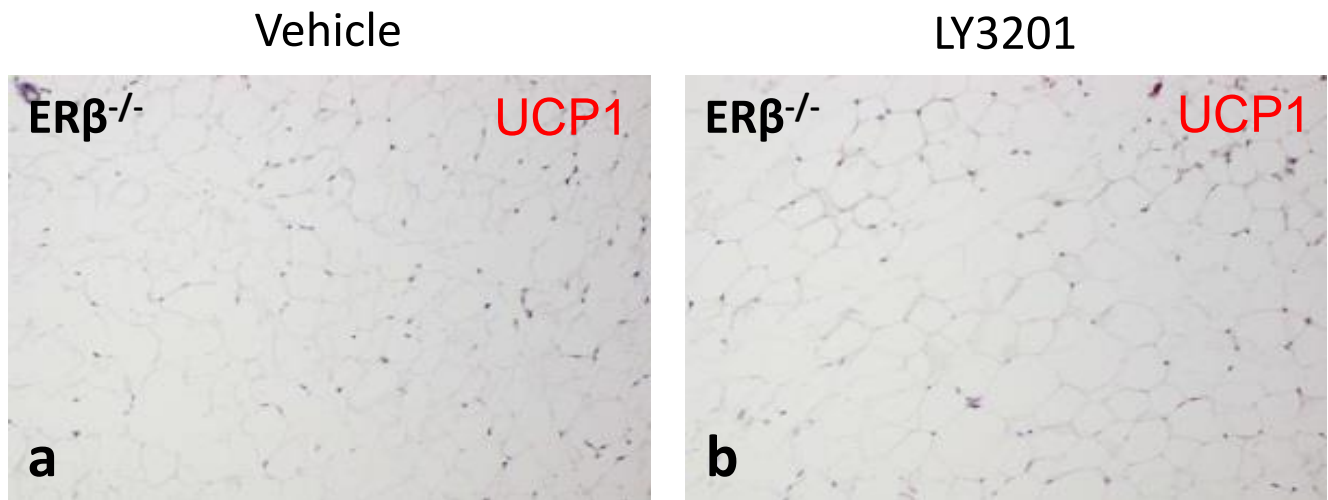

**Supplementary Figure S2.** Immunohistochemistry results showed that LY3201 treatment failed to induce UCP1 protein expression in 1-year-old ERβ knockout female mice (Left panel is vehicle group representative, right panel is LY treated group representative).

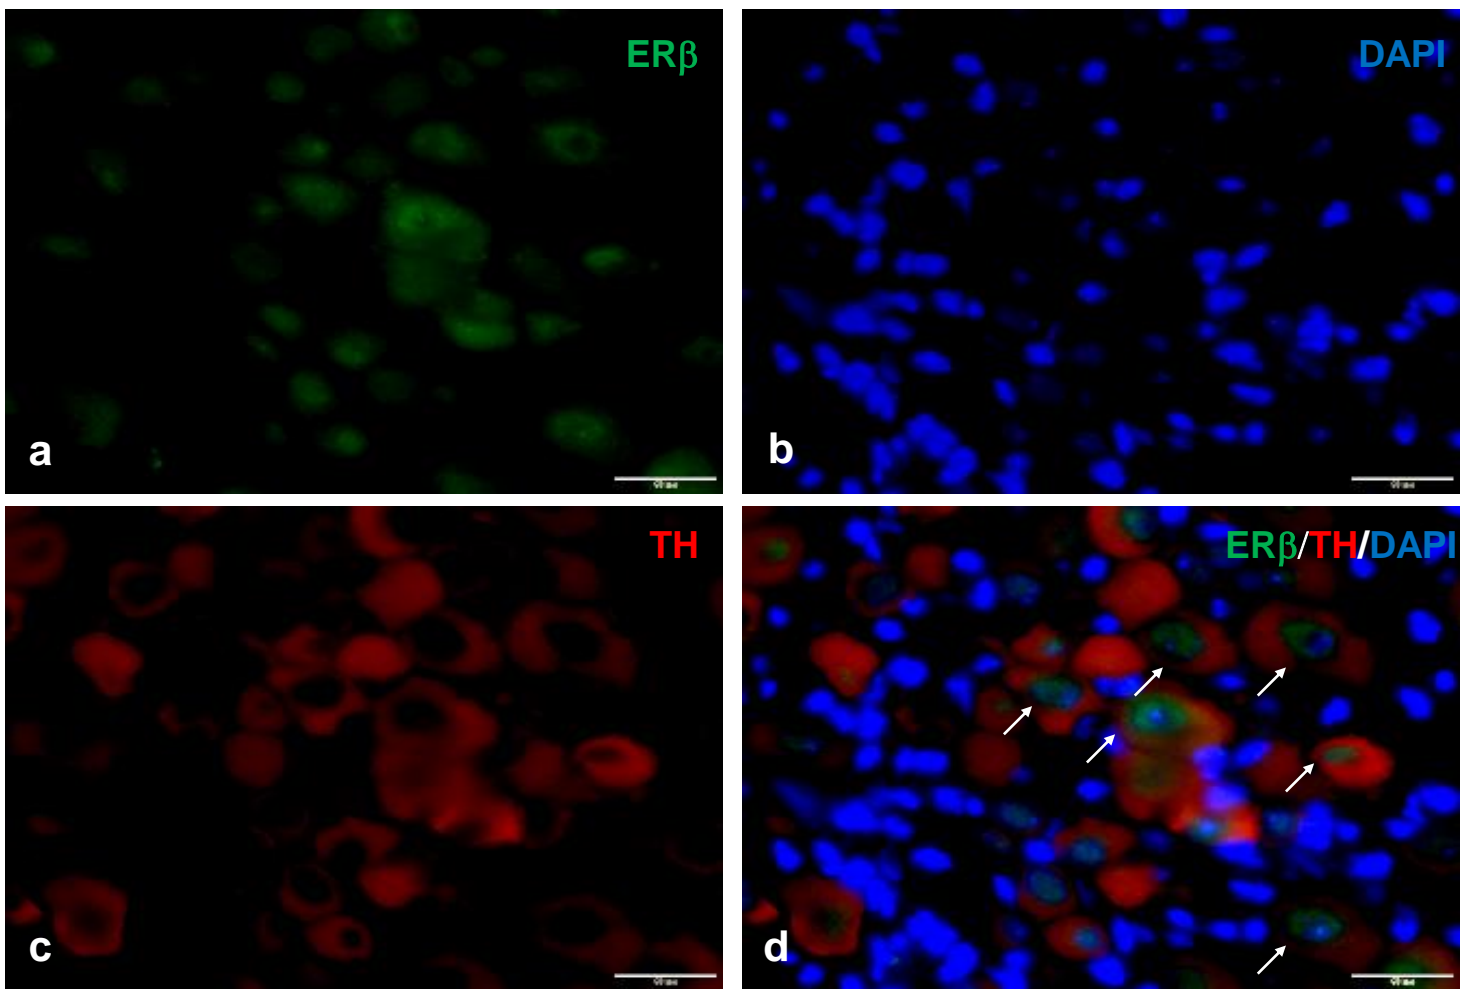

**Supplementary Figure S3.** Co-localization of ER $\beta$  with TH in the sympathetic ganglia (SG) of young female mice by immunofluorescence. ER $\beta$  staining appeared as green fluorescence (a), nuclei were marked with DAPI (b), whereas TH staining appeared as red fluorescence (c). Merged image (d) indicated that in the sympathetic ganglia of young female mice, ER $\beta$  was mostly expressed in nuclei (white arrows), and was rarely present in the cytoplasm indicated by TH expression.

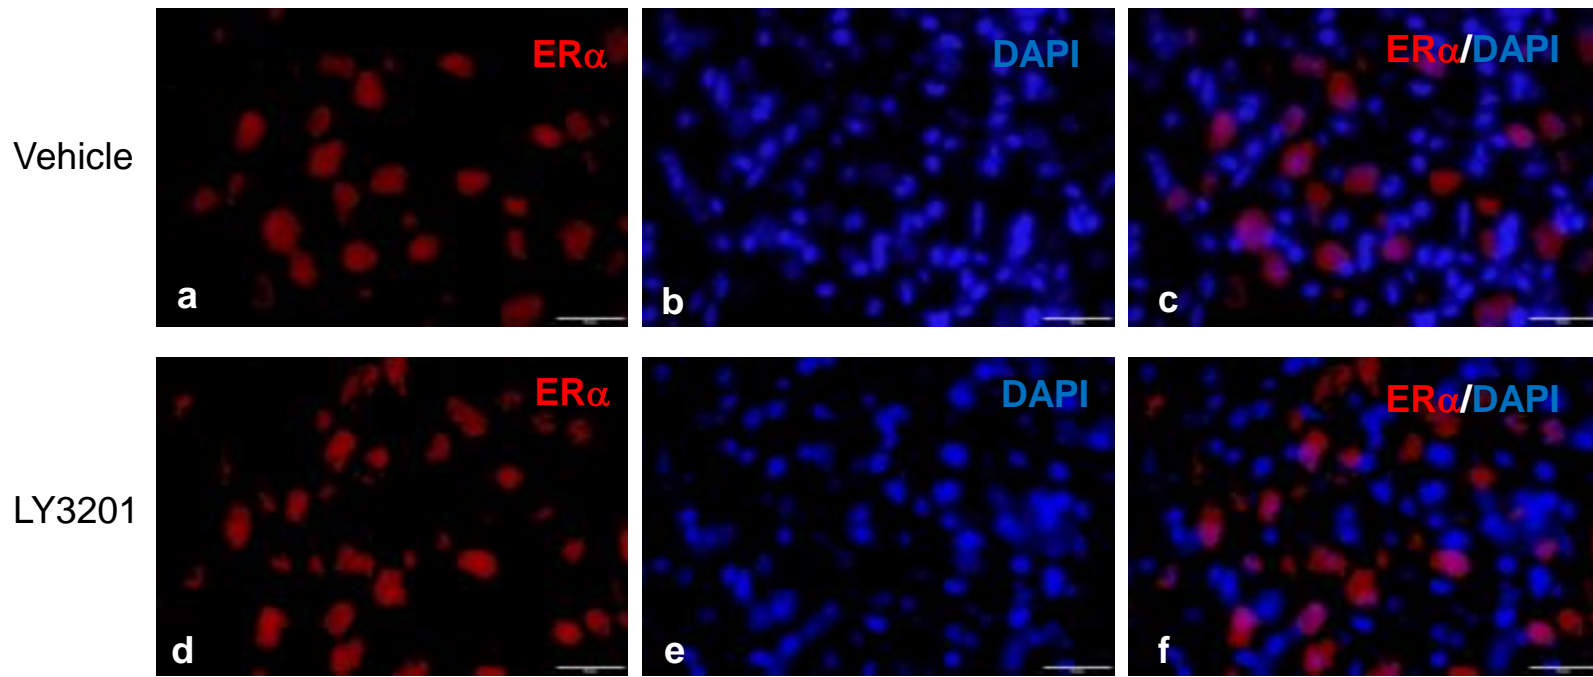

**Supplementary Figure S4.** SG ER $\alpha$  expression in both vehicle and LY3201-treated mice. Immunofluorescence results indicated that ER $\alpha$  was expressed in the nuclei of sympathetic neurons (c, f). No difference in ER $\alpha$  expression was found after 3 days' treatment with ER $\beta$  agonist (a, d). Scale bar, 50 $\mu$ m.

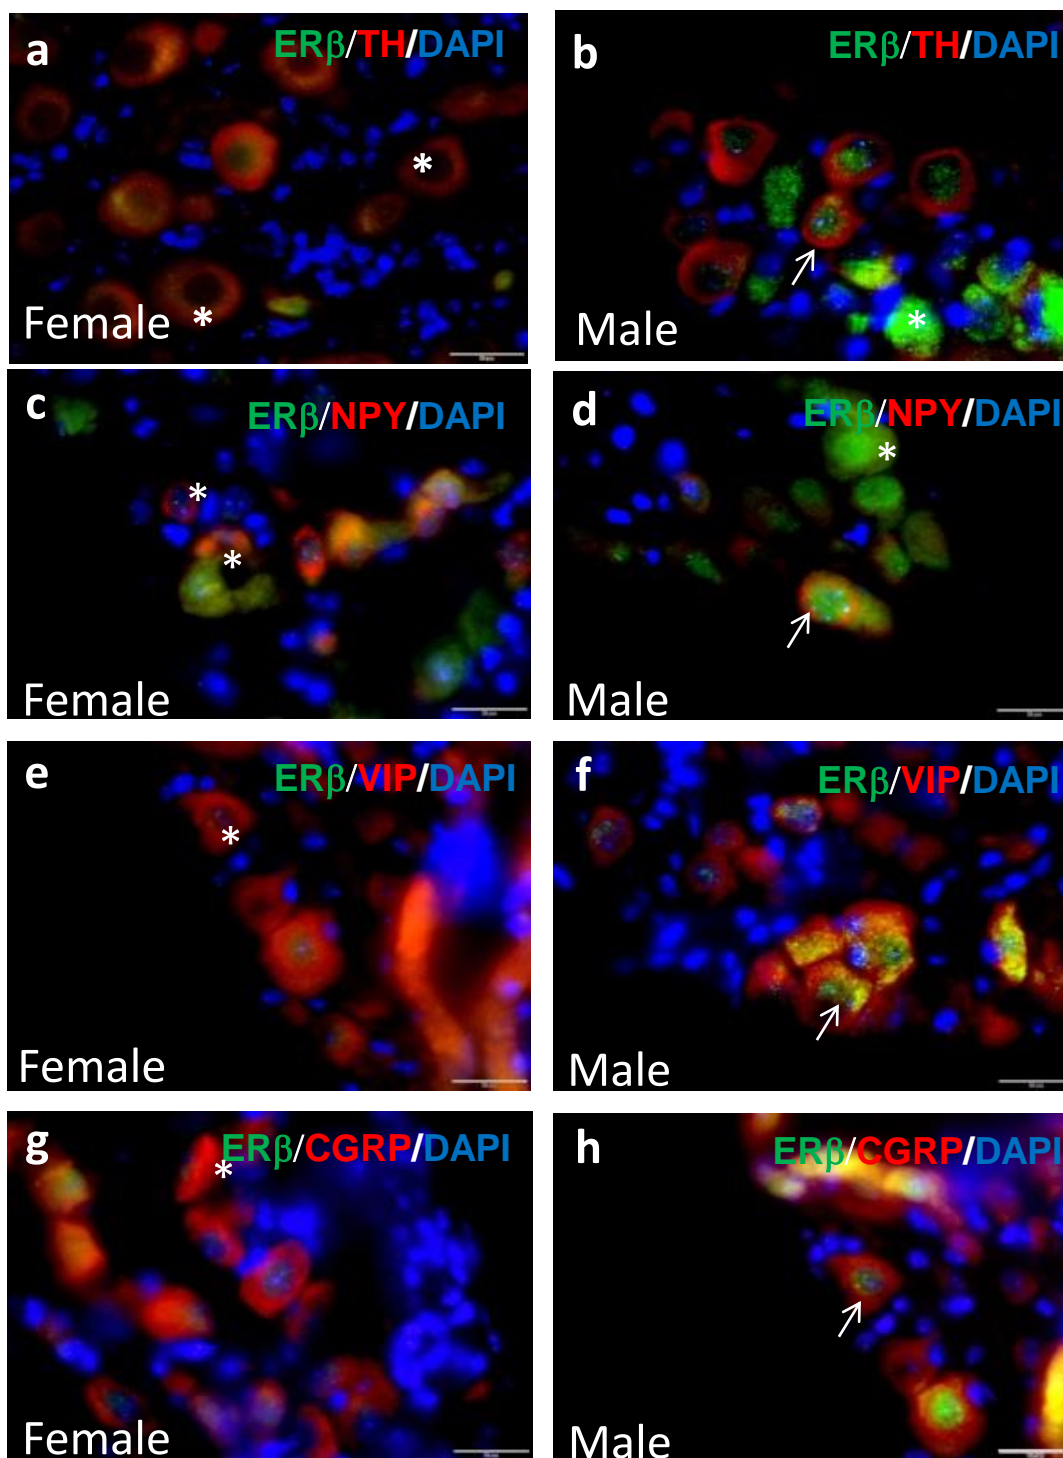

**Supplementary Figure S5.** Triple labeled immunostaining of anti-ER $\beta$  (green) and anti-TH (a and b, red)/NPY (c and d, red) /VIP (e and f, red) /CGRP (g and h, red) in 1-year-female (left panel) and 1-year-male (right panel) thoracolumbar sympathetic neurons. Asterisks indicate in old female mice, some TH-positive neurons lose nuclear ER $\beta$  signal. The white arrows indicate in the old male mice, ER $\beta$  is mainly expressed in nucleus. Scale bar=20  $\mu$ m.

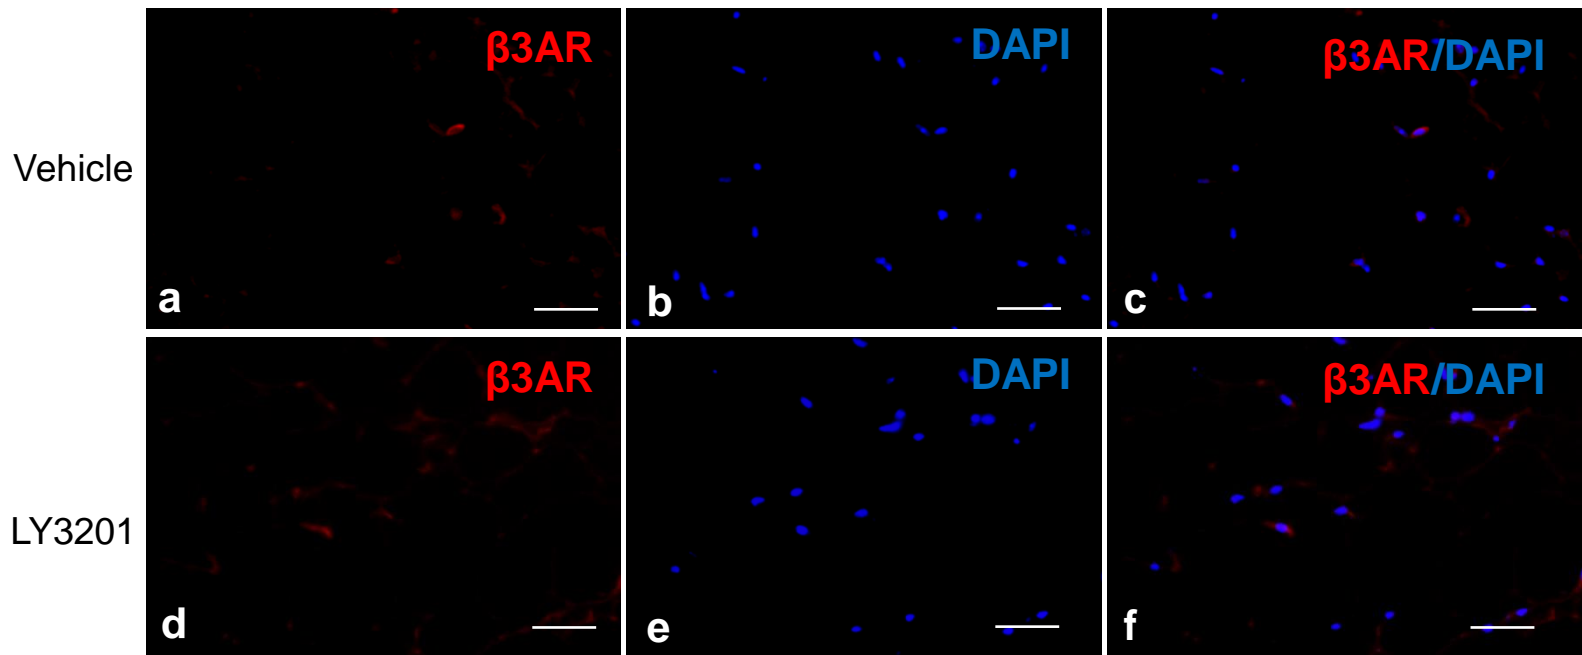

**Supplementary Figure S6.** Immunofluorescence results showed that LY3201 treatment failed to induce  $\beta 3$ -adrenoceptor ( $\beta 3AR$ ) protein expression in 1-year-old male mice (Upper panel is vehicle group representative, lower panel is LY treated group representative).

**Supplemental Table 1: Q-PCR primers**

| Genes          | Forward (5'→3')        | Reverse (5'→3')          |
|----------------|------------------------|--------------------------|
| UCP1           | GATCCAAGGTGAAGGCCAGG   | GTTGACAAGCTTTCTGTGG      |
| Cidea          | TGCTCTTCTGTATCGCCCAGT  | GCCGTGTTAAGGAATCTGCTG    |
| PGC1 $\alpha$  | CGGAAATCATATCCAACCAG   | TGAGAACCGCTAGCAAGTTTG    |
| PGC1 $\beta$   | AGGTGTTCGGTGAGATTGTA   | CCAGATGAGGGAAGGGAC       |
| PPAR $\gamma$  | TGCAACCGTTACCCCATAGAA  | TGCAACCGTTACCCCATAGAA    |
| AP2            | GCGTGGAATTCGATGAAATCA  | CCCGCCATCTAGGGTTATGA     |
| Tbx1           | GGCAGGCAGACGAATGTTC    | TTGTCATCTACGGGCACAAAG    |
| Tmem26         | ACCCTGTCATCCCACAGAG    | TGTTTGGTGGAGTCCTAAGGTC   |
| CD137          | CGTGCAGAACTCCTGTGATAAC | GTCCACCTATGCTGGAGAAGG    |
| Prdm16         | CTTCTCCGAGATCCGAAACTTC | GATCTCAGGCCGTTTGTCCAT    |
| pRb            | CTGGCCTGTGCTCTTGAAGTT  | CCACGGGAAGGACAAATCTGT    |
| Foxc2          | TCCATGGGAACCTTCTTCGA   | GATCTCAAAGTGAAGTGCAGGATA |
| DIO2           | ATGGGACTCCTCAGCGTAGA   | GCACAGGCAAAGTCAAGAAG     |
| Cyclin A2      | GCCTTCACCATTCATGTGGAT  | TTGCTCCGGGTAAAGAGACAG    |
| Cyclin B1      | AAGGTGCCTGTGTGTGAACC   | GTCAGCCCCATCATCTGCG      |
| PCNA           | TTTGAGGCACGCCTGATCC    | GGAGACGTGAGACGAGTCCAT    |
| Ki67           | ATCATTGACCGCTCCTTTAGGT | GCTCGCCTTGATGGTTCCT      |
| C/EBP $\alpha$ | CAAGAACAGCAACGAGTACCG  | GTCACTGGTCAACTCCAGCAC    |
| C/EBP $\delta$ | CGACTTCAGCGCCTACATTGA  | CTAGCGACAGACCCACAC       |
